# Supplementary material for: Photodegradation of sulfamethazine in an aqueous solution by a bismuth molybdate photocatalyst
Source: Royal Society of Chemistry journal article supplement (doi:10.1039/c3cy20811g), 2013-01-01
Supplement: c3cy20811g.pdf [file c3cy20811g.pdf]

## Electronic supplementary information for

Photodegradation of sulfamethazine in aqueous solution by bismuth molybdate photocatalyst

Changsheng Guo<sup>a</sup>, Jian Xu<sup>a\*</sup>, Shanfeng Wang<sup>a,b</sup>, Yuan Zhang<sup>a</sup>, Yan He<sup>a</sup>, Xiaochen Li<sup>b</sup>

<sup>a</sup> State Key Laboratory of Environmental Criteria and Risk Assessment, Chinese Research Academy of Environmental Sciences, Beijing 100012, China

<sup>b</sup> Water Conservancy and Civil Engineering College, Shandong Agricultural University, Shandong, Tai'an 271018, China

\*: Corresponding author. Tel: +86-10-84915237; Fax: +86-10-84926073, E-mail: xujian@craes.org.cn

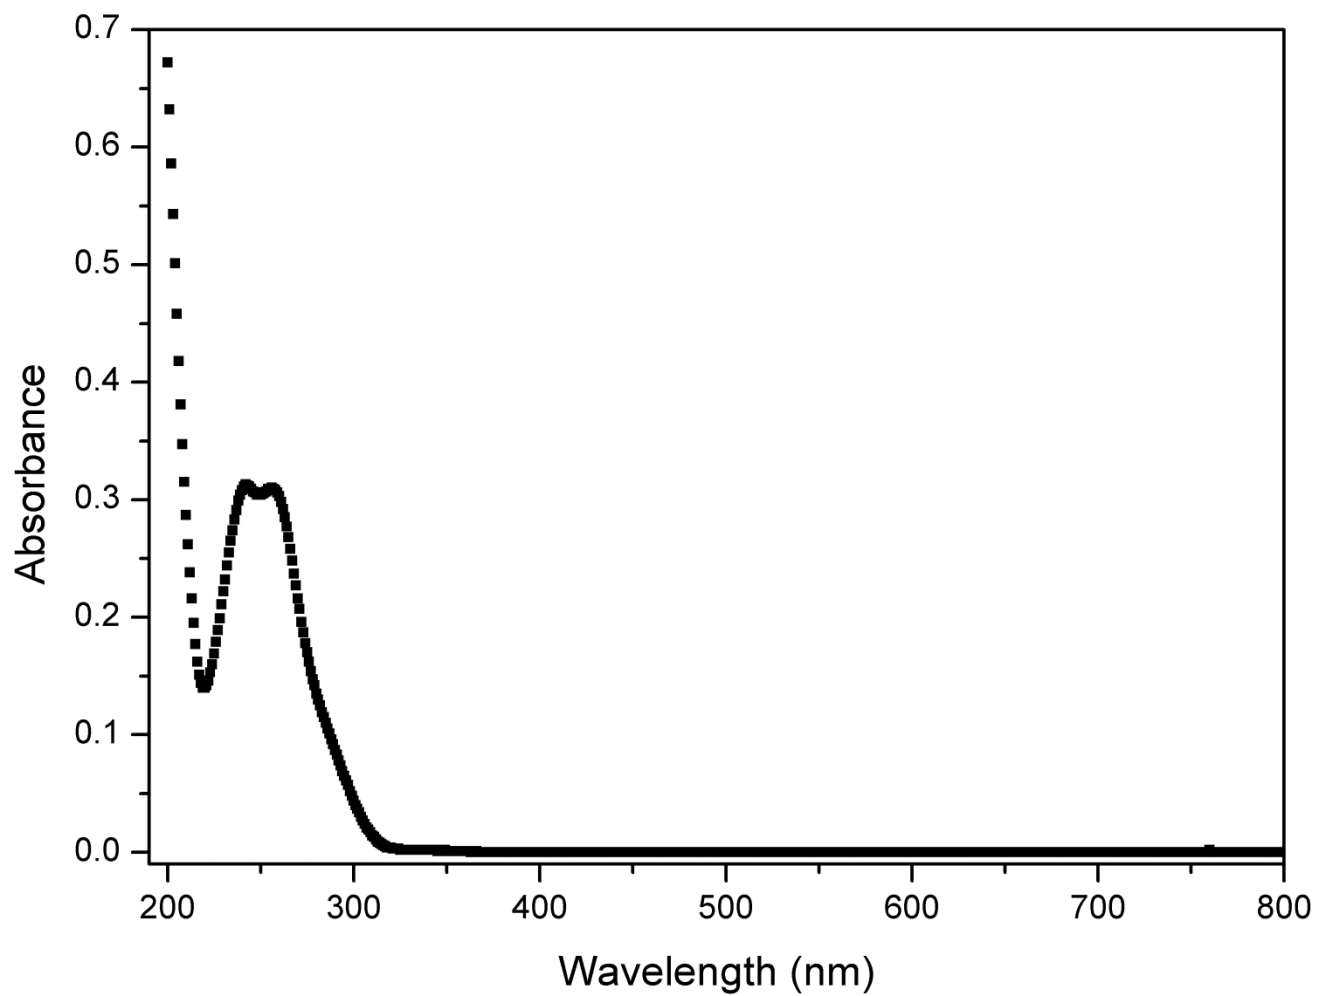

Fig. S1 UV-vis spectrum of the sulfamethazine

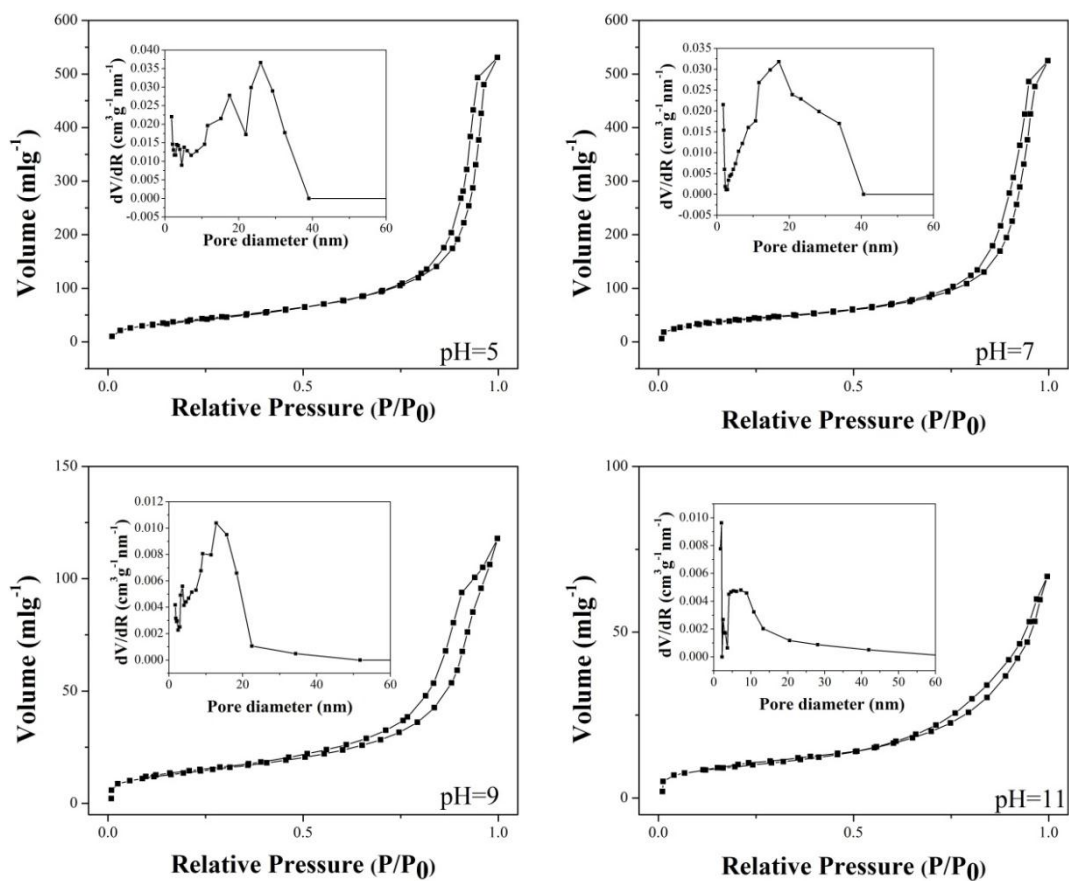

Fig. S2 N<sub>2</sub> adsorption–desorption isotherm curves and pore size distribution (insets) of the samples.

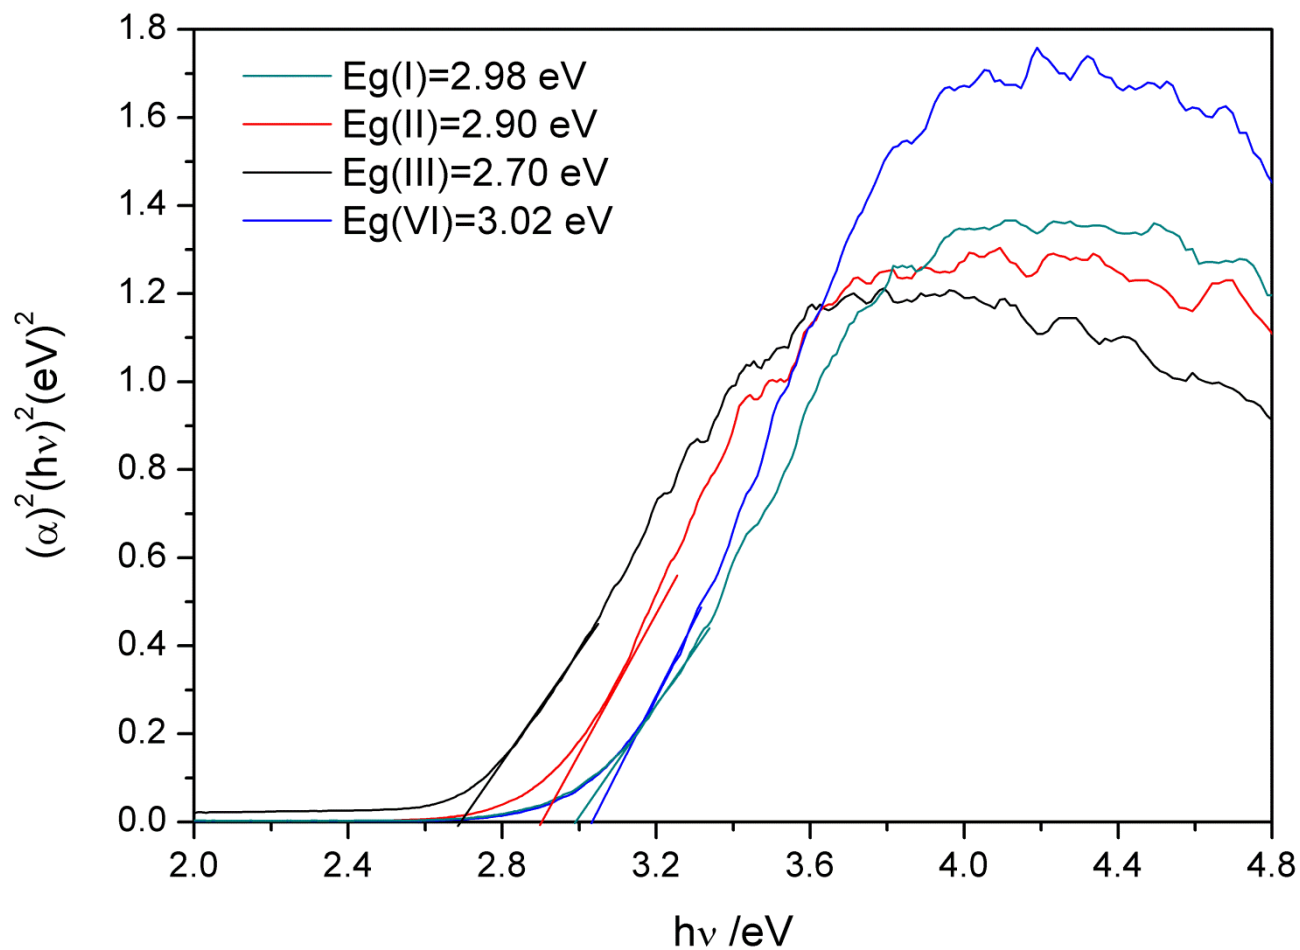

Fig. S3 Plots of  $(\alpha h\nu)^2$  versus photon energy ( $h\nu$ ) for the band gap energies of  $\text{Bi}_2\text{MoO}_6$  powders.

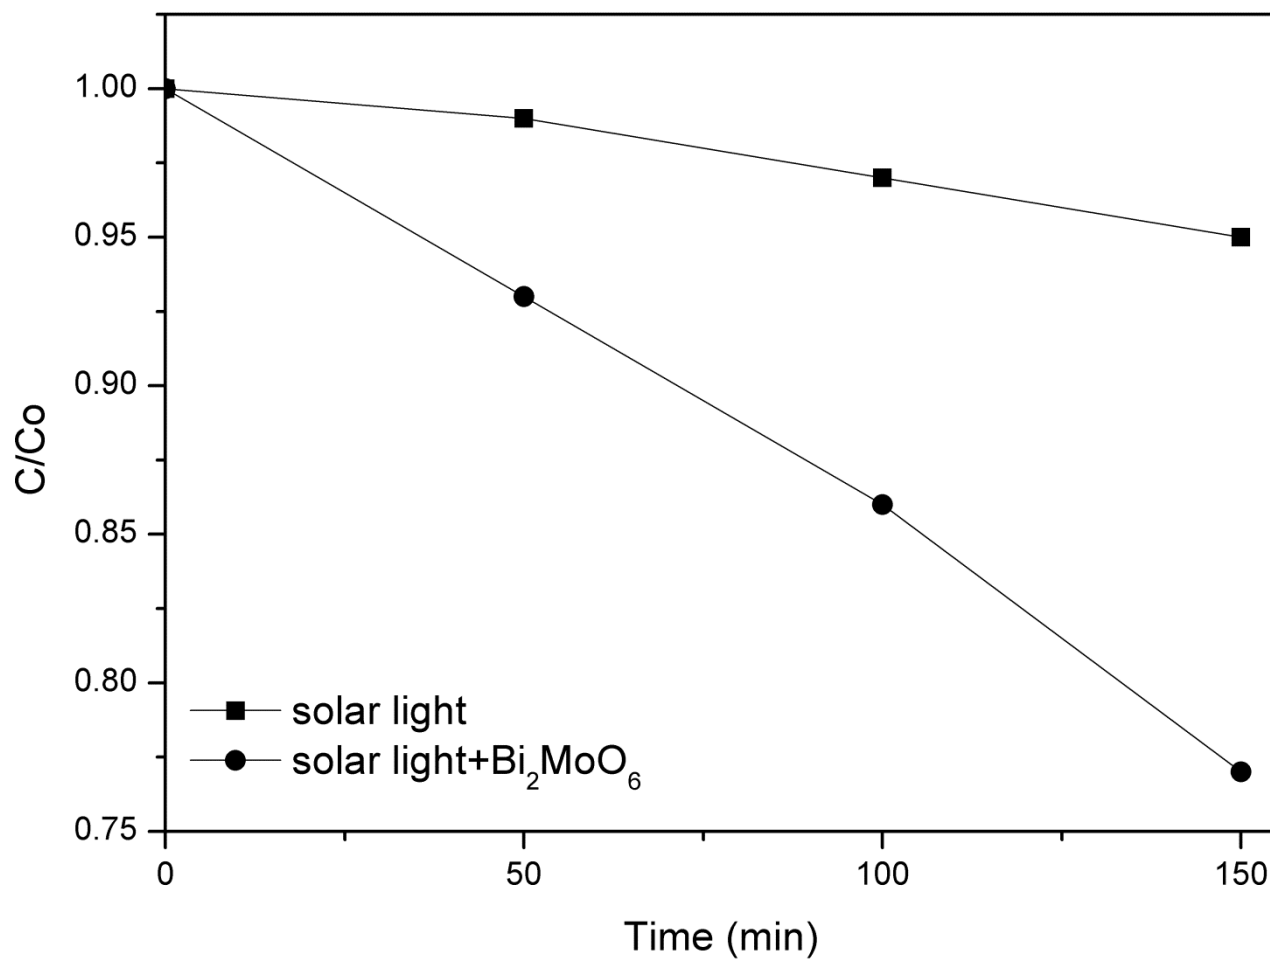

Fig. S4 TOC evolution with the reaction time in the presence of Bi<sub>2</sub>MoO<sub>6</sub> under simulated solar light irradiation

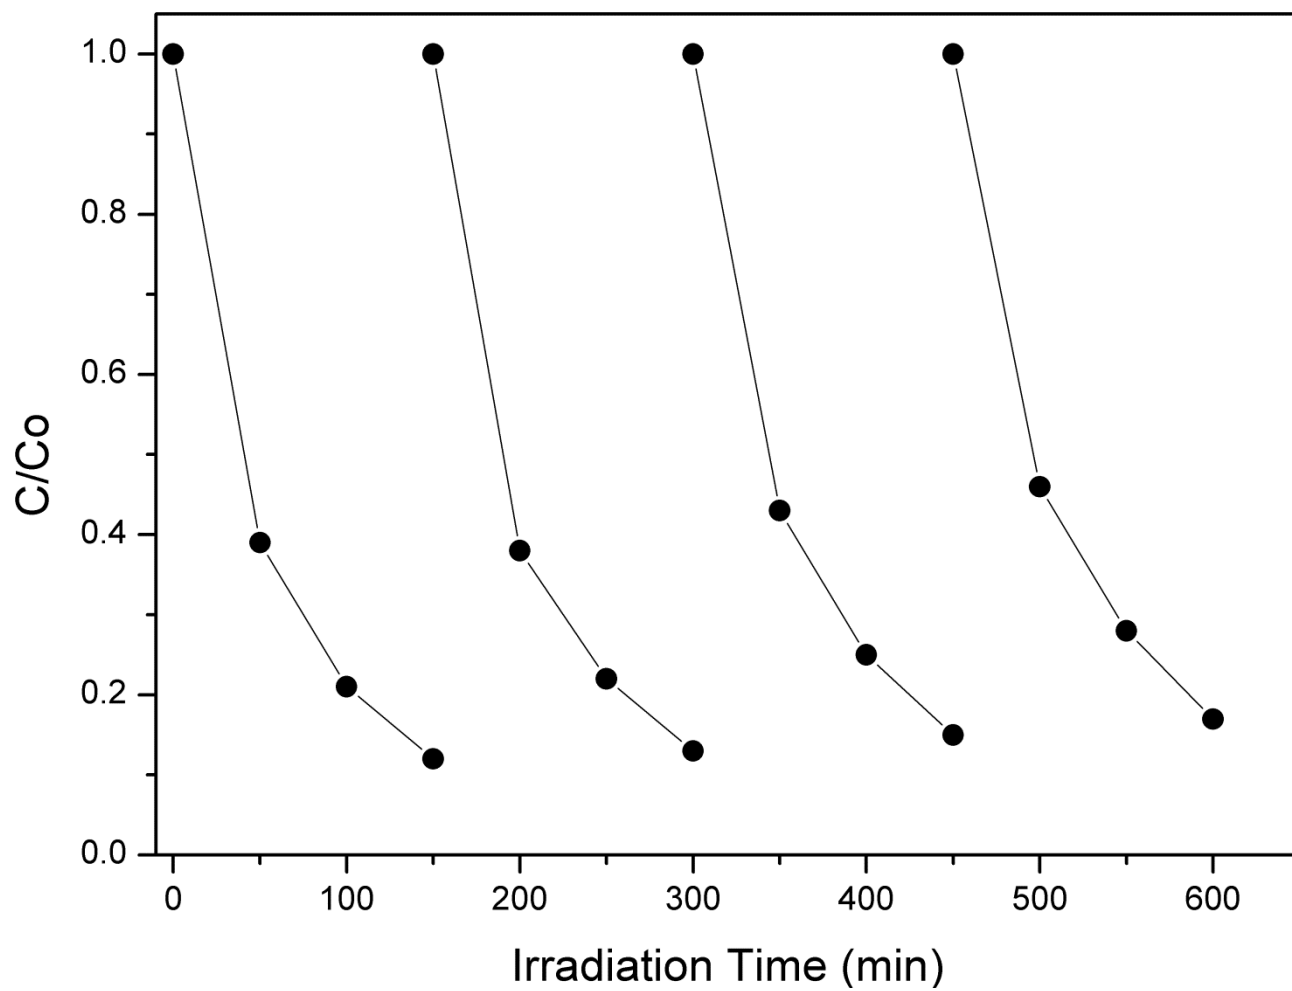

Fig. S5 Cycling runs of Bi<sub>2</sub>MoO<sub>6</sub> for the degradation of SMZ under simulated solar light irradiation.

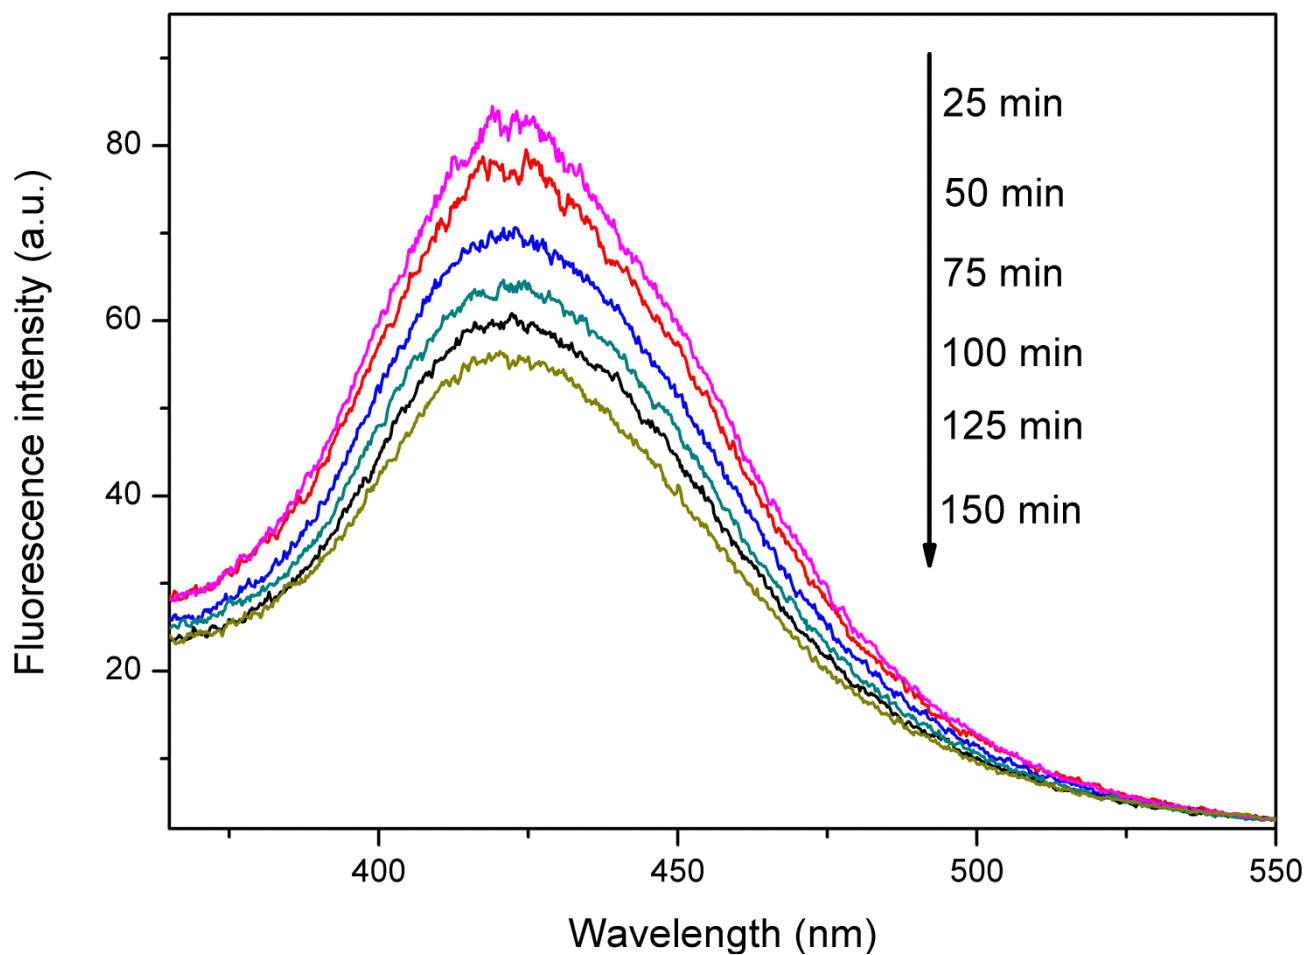

Fig. S6 Temporal photoluminescence spectral changes of  $5 \times 10^{-4}$  M terephthalic acid solution in  $2 \times 10^{-3}$  M NaOH by  $\text{Bi}_2\text{MoO}_6$  catalyst under simulated solar light irradiation.

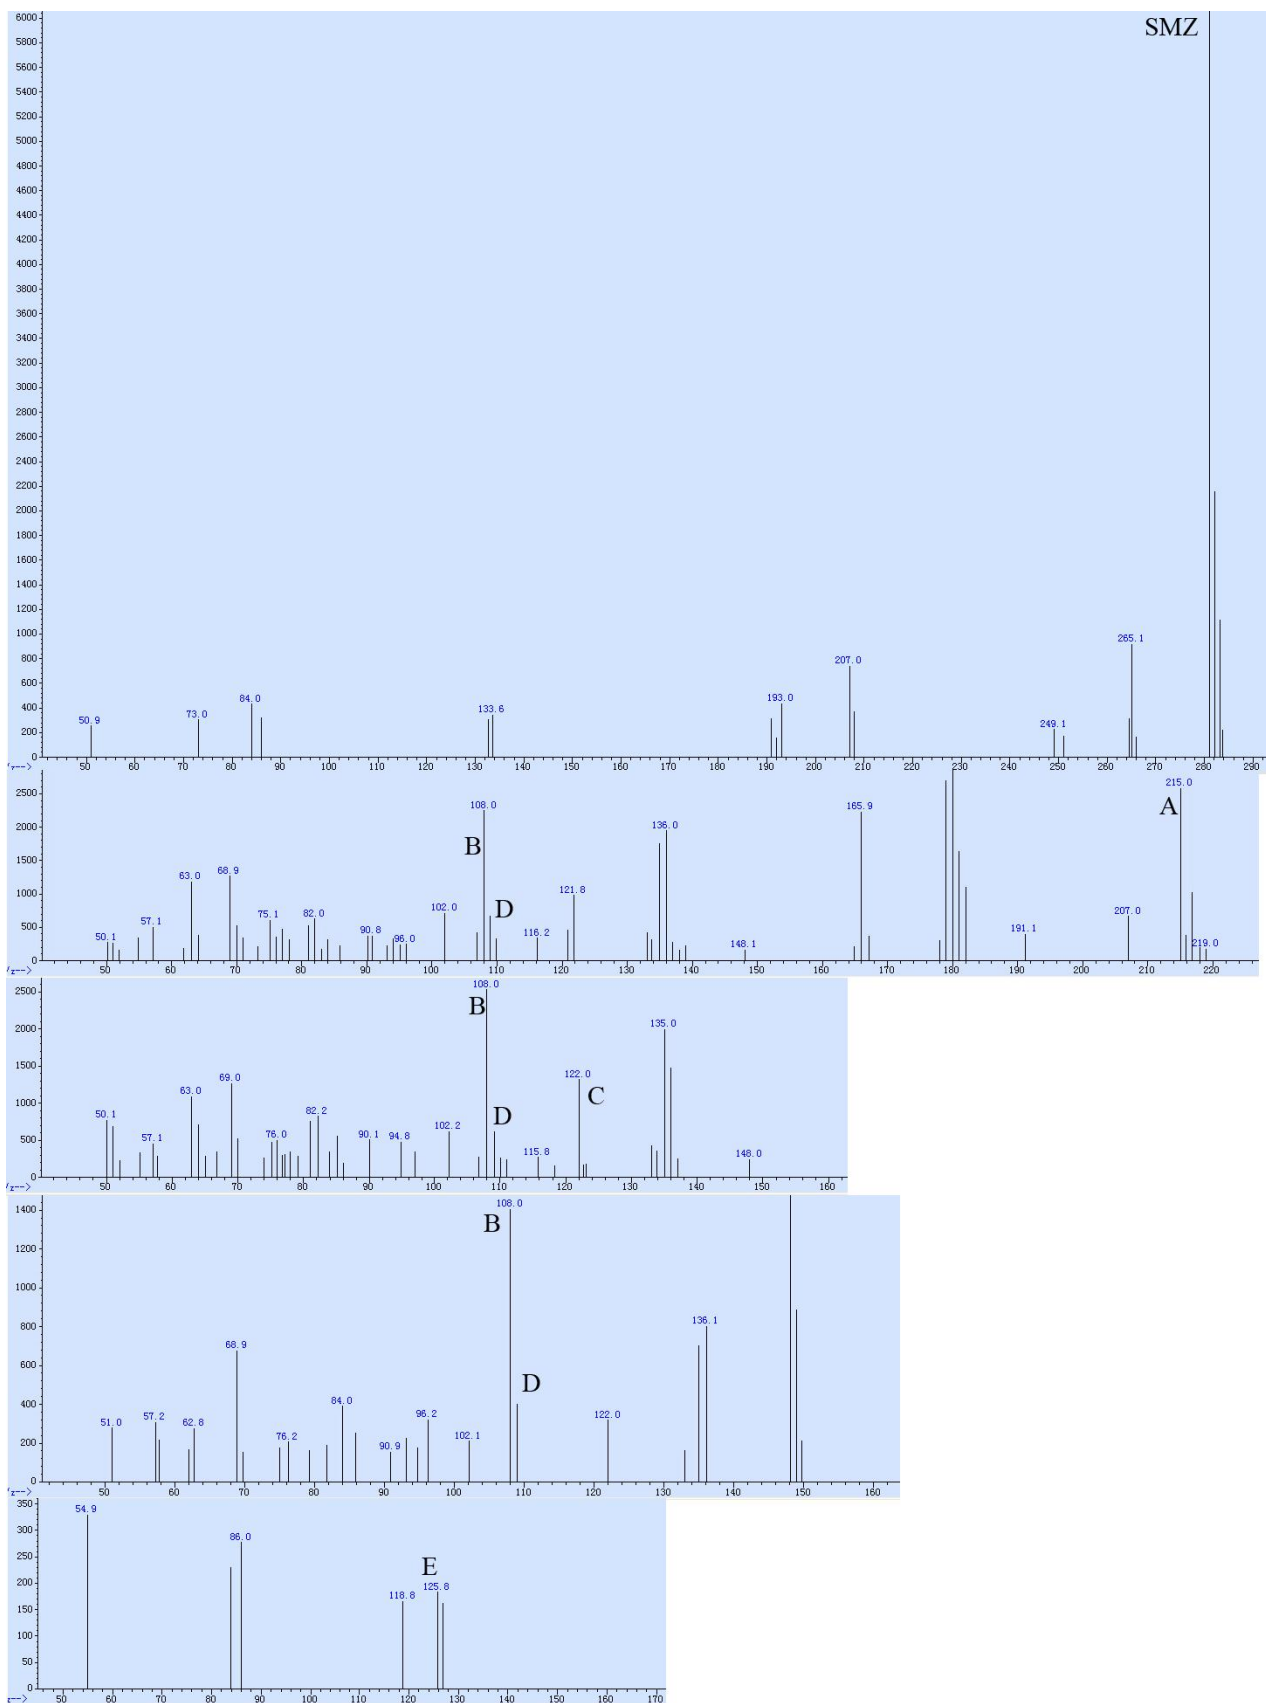

Fig. S7 MS spectra of the intermediates detected in the photocatalytic degradation of SMZ under simulated solar light irradiation.
